# Supplementary material for: Osteoclasts degrade bone and cartilage knee joint compartments through different resorption processes
Source: Springer Nature journal article supplement (doi:10.1186/s13075-018-1564-5), 2018-04-10

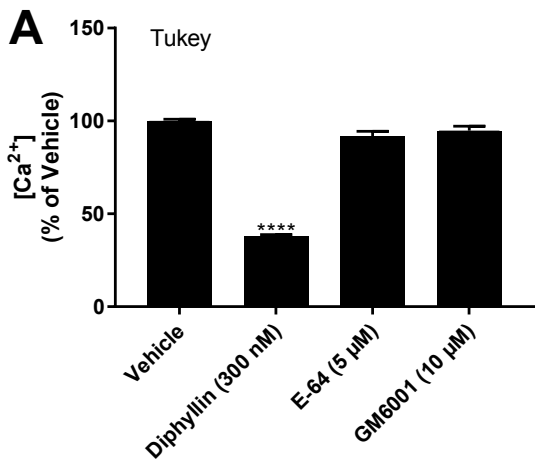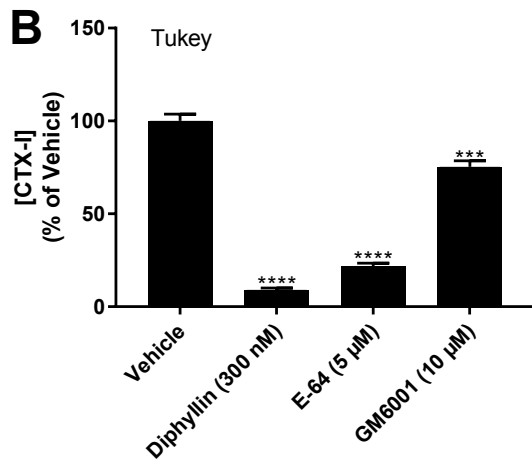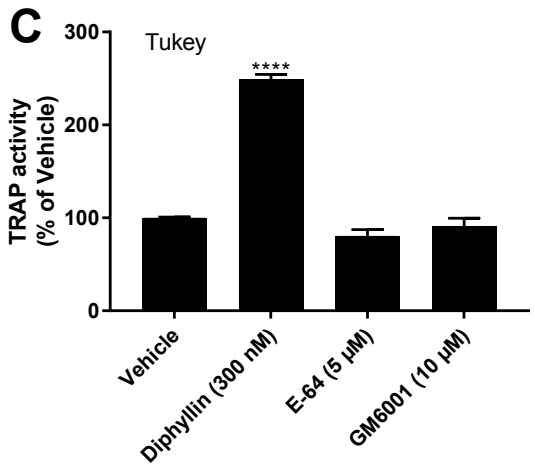

Supplement: MOESM2 [file 15604902]
